# Supplementary material
Source: MDPI journal article supplement (https://www.mdpi.com/1999-4907/12/1/11)

## Supporting information

**S1 Figure. Venn diagram of the differentially expressed genes by the post-infection of the virus FcMV1.**

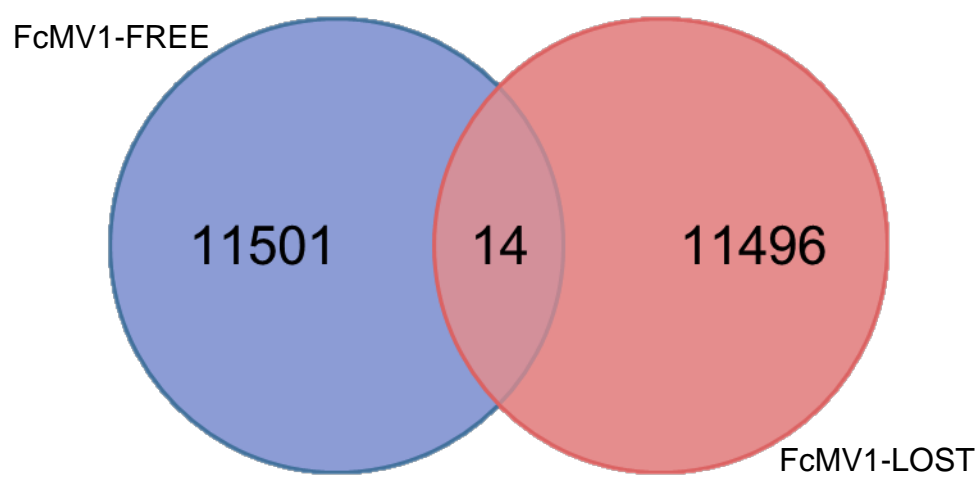

**S2 Figure. Sequences of the differentially expressed genes by the post-infection of the virus FcMV1 without a known function.**

>FCIRG\_04879

MEELEACVLFPSPKQQETQRLRERNRIAKRASSMLPRLYCNCLPFSVLTCLRSAPTAT\*AAQRQYCGRCS  
TANANCRSNFAGLGSAIAPATISWLWLWLWL\*L\*LRLCTGRGVGRPWRLGTRRP RR PYR PALALFSR\*G  
LAWF\*WFTSGHA\*PSSALSLSPLSPEDIQPRAESTTSIFHDFTHLRLQRSQQ\*TI\*ATPHRRSQWNDRY  
SPLVDQGRRRRRELARLLRHNSPPYRCTLSTCKCSRAAGESRSKYQCPGLGQHDGP\*SSSEGSGRRARQYS  
PLWWS\*ASL

>FCIRG\_11031

MHASAAVLAFVAVAAAAQTPVAPVATPVATPGAR\*F\*PFLTILCSRQFN\*HQR\*\*PPTVLSPAPAPAPP  
PTALVPSASAASLVPSLLPLPC

**S3 Figure. Scatter plot representing the differentially expressed genes of this analysis. X-axis: normalized means in condition free of FcMV1 infection. Y-axis: normalized means in condition of FcMV1 post-infection. Red dot: down-regulated genes; green dot: up-regulated genes.**

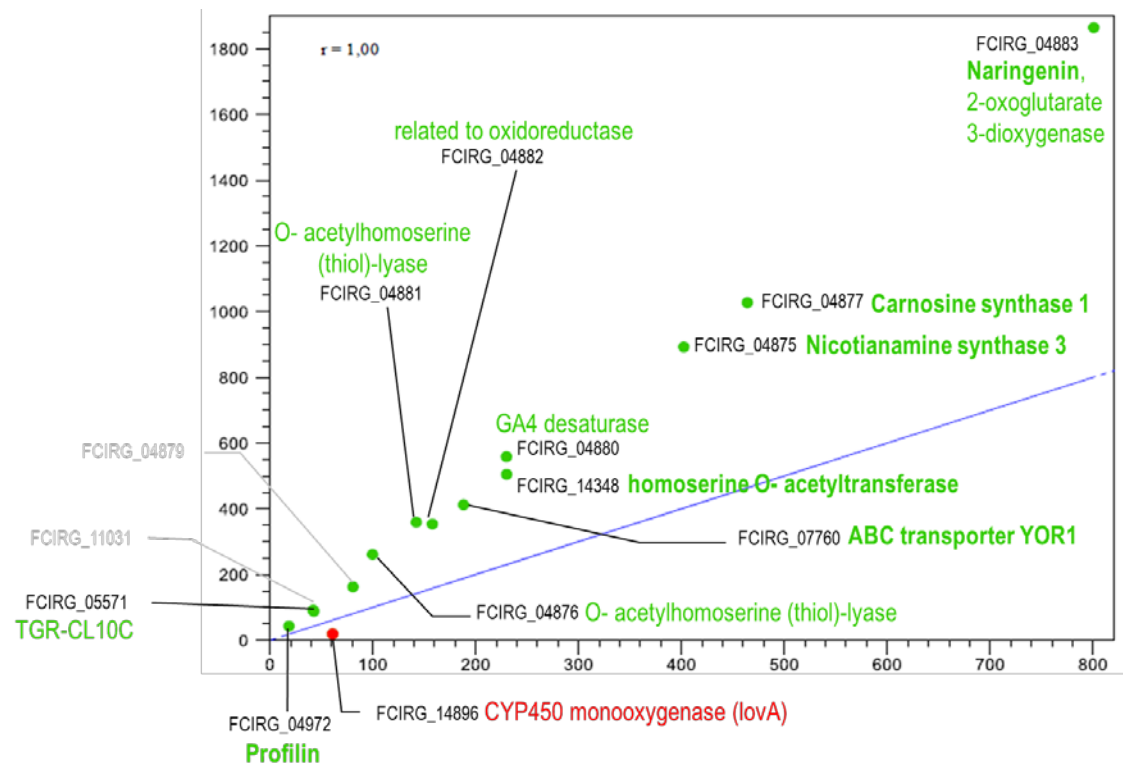

**S4 Figure. FET enriched GO terms associated with the differentially expressed genes of *Fusarium circinatum* previously infected by FcMV1.**

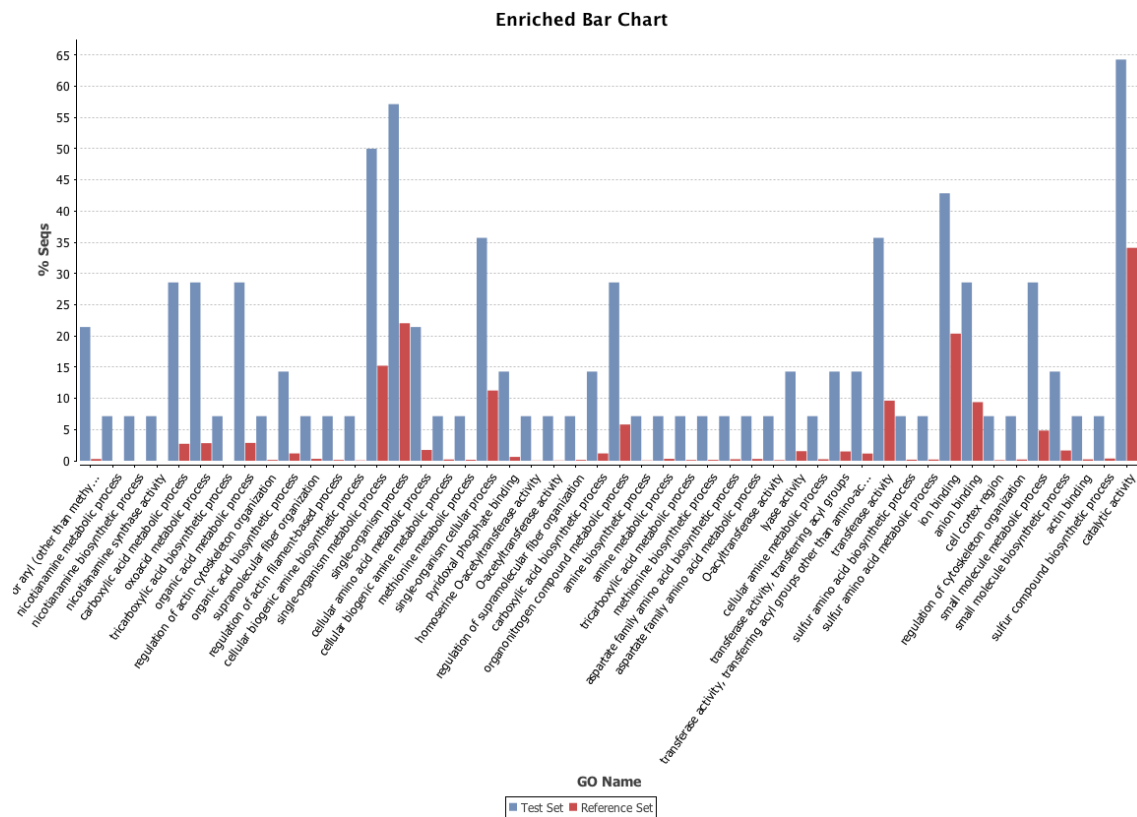

**S5 Figure. Distribution of GO terms represented in this analysis by biological processes, cellular components and molecular functions.**

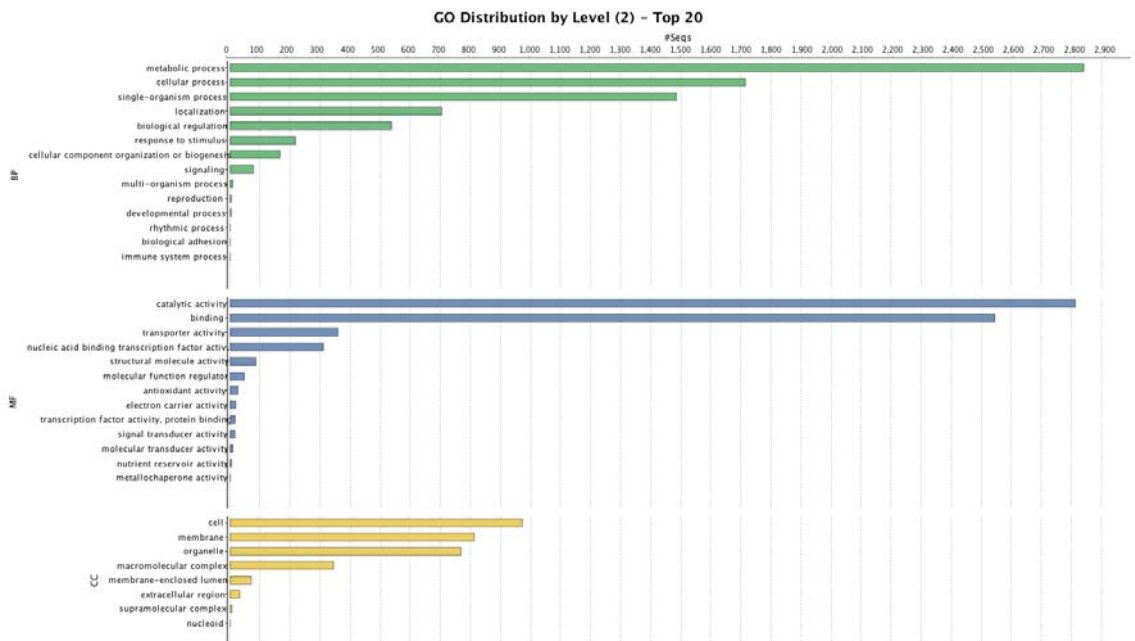

**S6 Figure. Distribution of the sequences of the analysis in the InterProScan domains.**

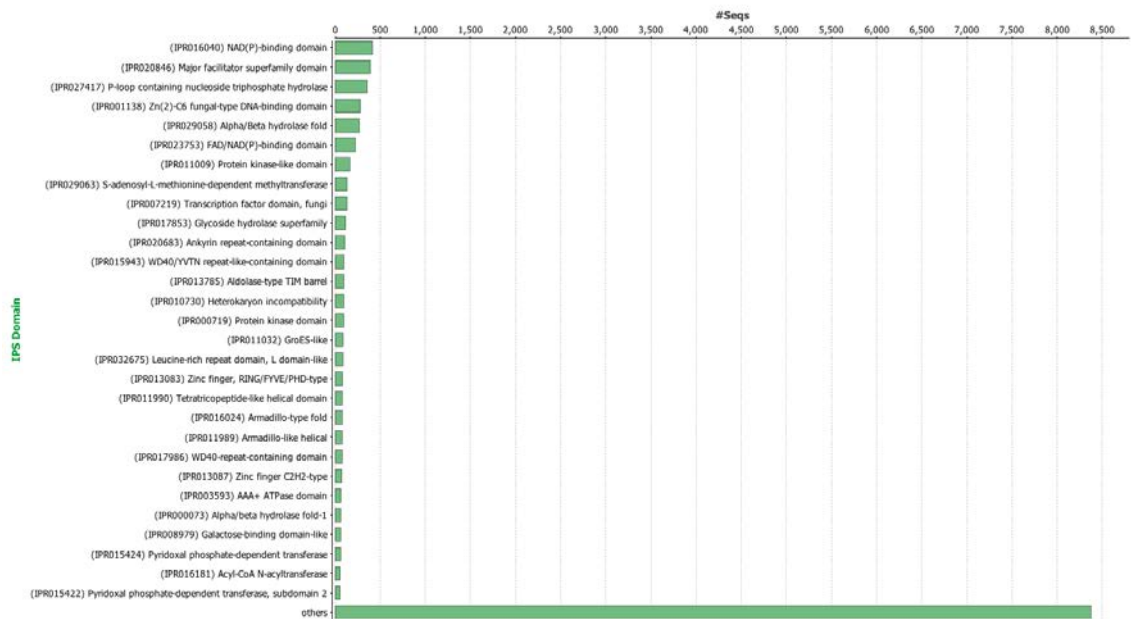

**S7 Figure. Blast2GO blast results of the highest similarity species with higher Max ident and lower e-values.**

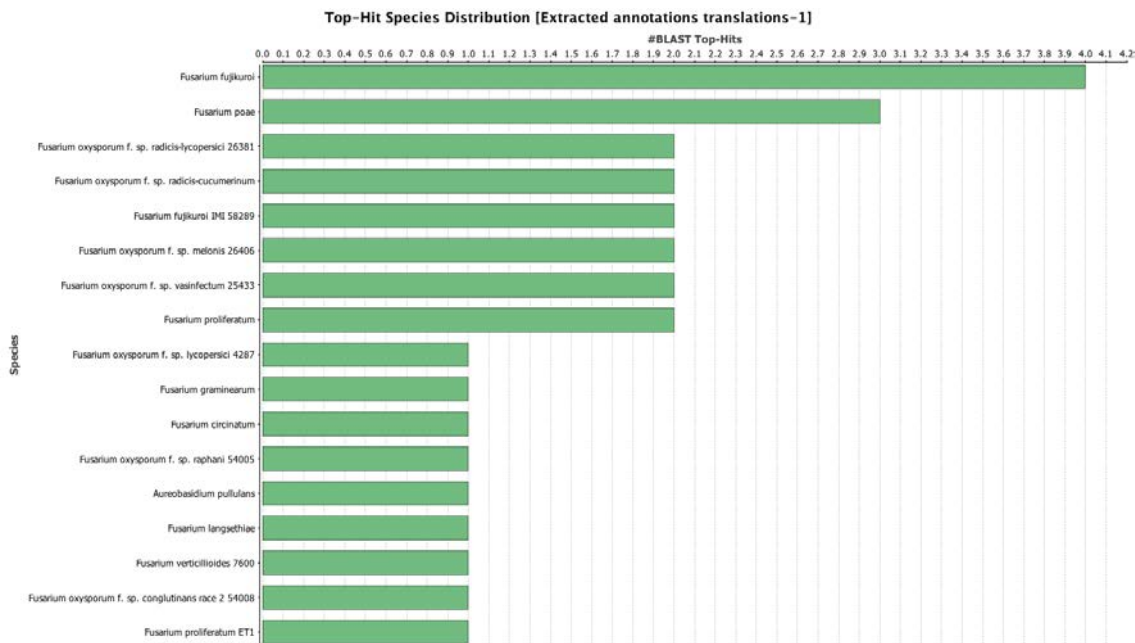

Supplement: s1 [file s1]
