# Supplementary material
Source: MDPI journal article supplement (https://www.mdpi.com/1999-4907/12/1/11)
Supplement: s1 [file s1]

Archive with 2 entries (2 files):
- 20201007-Supporting_information.pdf
- 20201007-Supplementary_tables.xlsx
