# Supplementary material
Source: MDPI journal article supplement (https://www.mdpi.com/1999-4907/12/1/11)
Supplement: s1 [file s1 › 20201007-Supplementary_tables.xlsx]

## Sheet: Table S1
	Table S1: RNA sequencing and genome mapping statistics
	Condition	Isolate	Number of Reads	Average Read Length (bp)		Reads Mapped to Genome*
			Before Trimming	Before Trimming	After Trimming	Number	Percentage
	Free-virus monosporic	FC072 (1)	58988010	75	73	115637372	98.01
		FC072 (2)	59120902	75	73	115914045	98.03
		FC072 (3)	66538581	75	73	130399029	97.99
	Previous infection	FC072V (4)	54741864	75	73	107237754	97.94
		FC072V (5)	57606375	75	73	113029806	98.1
		FC072V (6)	72397413	75	73	141867923	97.98
	*Reads mapped in pairs and in broken pairs

## Sheet: Table S2
	Table S2: Genes highly expressed of F. circinatum shared in both conditions
	Gene ID	Putative Product or Domain
	FCIRG_14791	uncharacterized protein LW94_14231
	FCIRG_06373	peptidyl-prolyl cis-trans mitochondrial
	FCIRG_11853	uncharacterized protein Y057_14581
	FCIRG_11353	probable cross-pathway control
	FCIRG_10910	No significant similarity
	FCIRG_10060	probable CAP20-virulence factor
	FCIRG_01166	No significant similarity
	FCIRG_03855	Trypsin
	FCIRG_11092	No significant similarity
	FCIRG_02001	No significant similarity
	FCIRG_11421	related to SRP40 Suppressor of mutant AC40 of RNA polymerase I and III
	FCIRG_01988	related to rasp f 7 allergen
	FCIRG_09536	hypothetical protein FOXB_06646
	FCIRG_13979	hypothetical protein FOIG_13019
	FCIRG_04909	translation elongation factor 1-
	FCIRG_06991	probable woronin body major precursor
	FCIRG_13963	No significant similarity
	FCIRG_08090	phosphonopyruvate decarboxylase
	FCIRG_08086	phosphoenolpyruvate phosphomutase
	FCIRG_08087	Clavaminate synthase
	FCIRG_07301	uncharacterized protein FPRN_09207
	FCIRG_06945	No significant similarity
	FCIRG_07249	uncharacterized protein FPRO_11210
	FCIRG_02937	probable SED1-abundant cell surface glyco
	FCIRG_01791	No significant similarity
	FCIRG_03210	uncharacterized protein FMAN_11198
	FCIRG_00093	No significant similarity
	FCIRG_13490	histone H3
	FCIRG_09942	hypothetical protein FOC1_g10007229
	FCIRG_13040	peptidase a4 family
	FCIRG_08263	No significant similarity

## Sheet: Table S3
	Table S3: FET enriched GO terms associated with the genes highly expressed of F. circinatum shared in both conditions
	GO ID	GO Term	Categorya	p-valueb	Over/Under
	GO:0007094	mitotic spindle assembly checkpoint	BP	0.0249987	Over
	GO:0000413	protein peptidyl-prolyl isomerization	BP	0.02035	Over
	GO:0006334	nucleosome assembly	BP	0.0234511	Over
	GO:0045899	positive regulation of RNA polymerase II transcription preinitiation complex assembly	BP	0.0109993	Over
	GO:0006409	tRNA export from nucleus	BP	0.02035	Over
	GO:0001080	nitrogen catabolite activation of transcription from RNA polymerase II promoter	BP	0.0109993	Over
	GO:0070911	global genome nucleotide-excision repair	BP	0.00472589	Over
	GO:0002182	cytoplasmic translational elongation	BP	0.0311696	Over
	GO:0031454	regulation of extent of heterochromatin assembly	BP	0.00472589	Over
	GO:0051701	interaction with host	BP	0.0464602	Over
	GO:0010691	negative regulation of ribosomal protein gene transcription from RNA polymerase II promoter in response to nutrient levels	BP	0.00315258	Over
	GO:0009303	rRNA transcription	BP	0.0187965	Over
	GO:1903833	positive regulation of cellular response to amino acid starvation	BP	0.0094339	Over
	GO:0043505	CENP-A containing nucleosome	CC	0.00472589	Over
	GO:0000788	nuclear nucleosome	CC	0.00629721	Over
	GO:0005853	eukaryotic translation elongation factor 1 complex	CC	0.00157729	Over
	GO:0031934	mating-type region heterochromatin	CC	0.0265444	Over
	GO:0031618	nuclear pericentric heterochromatin	CC	0.0418934	Over
	GO:0031298	replication fork protection complex	CC	0.0249987	Over
	GO:1990707	nuclear subtelomeric heterochromatin	CC	0.0249987	Over
	GO:0030446	hyphal cell wall	CC	0.0327074	Over
	GO:0030445	yeast-form cell wall	CC	0.0249987	Over
	GO:0019003	GDP binding	MF	0.00786655	Over
	GO:0005516	calmodulin binding	MF	0.0187965	Over
	GO:0003746	translation elongation factor activity	MF	0.0141241	Over
	GO:0031492	nucleosomal DNA binding	MF	0.00315258	Over
	GO:0003755	peptidyl-prolyl cis-trans isomerase activity	MF	0.02035	Over
	a Go categories include Biological Process (BP), Cellular Component (CC) and Molecular Function (MF)
	b Enrichment testing was conducted using a Fisher's exact test to determine GO terms enriched in the list of highly expressed genes compared the entire gene complement

## Sheet: Table S4
	Table S4: Genes highly expressed in Fc072v cultures of F. circinatum
	Gene ID	Putative Product or Domain
	FCIRG_06570	glyceraldehyde 3-phosphate dehydrogenase
	FCIRG_04883	related to naringenin,2-oxoglutarate 3-dioxygenase
	FCIRG_05704	No significant similarity

## Sheet: Table S5
	Table S5: FET enriched GO terms associated with the genes highly expressed in Fc072v cultures of F. circinatum
	GO ID	GO Term	Categorya	p-valueb	Over/Under
	GO:0015886	heme transport	BP	3.15457e+12	Over
	GO:0009435	NAD biosynthetic process	BP	0.00567823	Over
	GO:0009166	nucleotide catabolic process	BP	0.00630915	Over
	GO:0009168	purine ribonucleoside monophosphate biosynthetic process	BP	0.00977918	Over
	GO:0061621	canonical glycolysis	BP	0.00378549	Over
	GO:0072593	reactive oxygen species metabolic process	BP	0.00504732	Over
	GO:0006915	apoptotic process	BP	0.0116719	Over
	GO:0042866	pyruvate biosynthetic process	BP	0.00410095	Over
	GO:0006094	gluconeogenesis	BP	0.00757098	Over
	GO:0070994	detection of oxidative stress	BP	6.30915e+11	Over
	GO:0032874	positive regulation of stress-activated MAPK cascade	BP	0.00126183	Over
	GO:0071470	cellular response to osmotic stress	BP	0.011041	Over
	GO:0035690	cellular response to drug	BP	0.0227129	Over
	GO:0006754	ATP biosynthetic process	BP	0.00694006	Over
	GO:0034599	cellular response to oxidative stress	BP	0.0337539	Over
	GO:0004365	glyceraldehyde-3-phosphate dehydrogenase (NAD+) (phosphorylating) activity	MF	3.15457e+12	Over
	GO:1990841	promoter-specific chromatin binding	MF	0.00252366	Over
	GO:0009277	fungal-type cell wall	CC	0.0170347	Over
	GO:0005576	extracellular region	CC	0.0299685	Over
	GO:1990315	Mcs4 RR-MAPKKK complex	CC	9.46372e+11	Over
	GO:0005811	lipid droplet	CC	0.00914826	Over
	a Go categories include Biological Process (BP), Cellular Component (CC) and Molecular Function (MF)
	b Enrichment testing was conducted using a Fisher's exact test to determine GO terms enriched in the list of highly expressed genes compared the entire gene complement

## Sheet: Table S6
	Table S6: Genes highly expressed in Fc072 cultures of F. circinatum
	Gene ID	Putative Product or Domain
	FCIRG_11205	hypothetical protein FOMG8731
	FCIRG_15053	No significant similarity
	FCIRG_11204	hypothetical protein FOC1_g10007646
	FCIRG_15004	related to phosphatidylserine decarboxylase 2
	FCIRG_03116	No significant similarity

## Sheet: Table S7
	Table S7: FET enriched GO terms associated with the genes up-regulated in F. circinatum by the FcMV1 residual effect
	GO ID	GO Term	Categorya	p-valueb	Over/Under
	GO:0090338	positive regulation of formin-nucleated actin cable assembly	BP	0.00504015	Over
	GO:1904530	negative regulation of actin filament binding	BP	0.00378191	Over
	GO:0009086	methionine biosynthetic process	BP	0.0299557	Over
	GO:0042989	sequestering of actin monomers	BP	0.00252246	Over
	GO:0019674	NAD metabolic process	BP	0.0336523	Over
	GO:0042908	xenobiotic transport	BP	0.0175572	Over
	GO:0000755	cytogamy	BP	0.00378191	Over
	GO:0043170	macromolecule metabolic process	BP	0.0439193	Under
	GO:0006734	NADH metabolic process	BP	0.0250105	Over
	GO:2000812	regulation of barbed-end actin filament capping	BP	0.00504015	Over
	GO:0006739	NADP metabolic process	BP	0.0212892	Over
	GO:0009092	homoserine metabolic process	BP	0.0125646	Over
	GO:1903475	mitotic actomyosin contractile ring assembly	BP	0.0188024	Over
	GO:0044396	actin cortical patch organization	BP	0.0237712	Over
	GO:0004414	homoserine O-acetyltransferase activity	MF	0.00378191	Over
	GO:0005546	phosphatidylinositol-4,5-bisphosphate binding	MF	0.0125646	Over
	GO:0052856	NADHX epimerase activity	MF	0.00126183	Over
	GO:0052857	NADPHX epimerase activity	MF	0.00126183	Over
	GO:0005085	guanyl-nucleotide exchange factor activity	MF	0.0410138	Over
	GO:0008559	ATPase-coupled xenobiotic transmembrane transporter activity	MF	0.0150633	Over
	GO:0003785	actin monomer binding	MF	0.00504015	Over
	GO:0070064	proline-rich region binding	MF	0.00126183	Over
	GO:0051285	cell cortex of cell tip	CC	0.0361108	Over
	GO:0031097	medial cortex	CC	0.0336523	Over
	GO:0019897	extrinsic component of plasma membrane	CC	0.0138146	Over
	GO:0030479	actin cortical patch	CC	0.0410138	Over
	a Go categories include Biological Process (BP), Cellular Component (CC) and Molecular Function (MF)
	b Enrichment testing was conducted using a Fisher's exact test to determine GO terms enriched in the list of highly expressed genes compared the entire gene complement

## Sheet: Table S8
	Table S8: Blast homology result of the genes implicated in post transcriptional gene silencing in Fusarium circinatum
	Gene Name	Description	Homologous gene	Species	NCBI Gene ID	Found in Fusarium circinatum	Fusarium circinatum loci	E-value
	QDE-2	Argonaute-like post-transcriptional gene silencing	FgAGO1	Fusarium graminearum	23555740	✓	FCIRG_07081	4e-126
			FgAGO2	F. graminearum	23547839	✓	FCIRG_02532	2e-145
	DCL-like	Ribonuclease Dicer-like proteins	FgDICER1	F. graminearum	23555993	x	N/A	N/A
			FgDICER2	F. graminearum	23551659	✓	FCIRG_09378	8e-157
	QDE-1	RNA-dependent RNA polymerase	FgRdRp1	F. graminearum	23553634	✓	FCIRG_04274	0
			FgRdRp2	F. graminearum	23555706	✓	FCIRG_09867	0
			FgRdRp3	F. graminearum	23549015	✓	FCIRG_10580	0
			FgRdRp4	F. graminearum	23551855	x	N/A	N/A
			FgRdRp5	F. graminearum	23556041	✓	FCIRG_01527	0
	Exonuclease QIP	exonuclease QDE2-interacting protein	FgQIP	F. graminearum	23553841	✓	FCIRG_12907	4e-131
	QDE-3	RecQ DNA helicase homologous to the Werner/Bloom Syndrome proteins	FgQDE3	F. graminearum	23548038	✓	FCIRG_09652	0
	RNase III	RNase III domain-containing protein	MRPL3	Neurospora crassa	3879682	✓	FCIRG_01616	0

## Sheet: Table S9
	Table S9: Expression ratios (RPKM and fold-change relative to the virus-free monosporic) of Fusarium circinatum genes involved in post transcriptional gene silencing
	Homologous gene	Gene Locus	GO Term assigneda	Mean expression RPKM (Fc072/Fc072v)b	Fold change	P-value	FDR p-value correction
	FgAGO1	FCIRG_07081	probable argonaute like post-transcriptional gene silencing QDE-2	11,47/12,12	1.06526	0.790212	1
	FgAGO2	FCIRG_02532	related to argonaute like post-transcriptional gene silencing QDE-2	0,21/0,19	-1.13786	0.943424	1
	FgDICER2	FCIRG_09378	related to Dcl-2 dicer RNA helicase	12,08/11,82	-1.01384	0.953604	1
	FgRdRp1	FCIRG_04274	related to qde-1 RNA-dependent RNA polymerase	8,66/8,33	-1.03341	0.906706	1
	FgRdRp2	FCIRG_09867	probable RNA-dependent RNA polymerase SAD-1	2,86/3,02	1.06144	0.900137	1
	FgRdRp3	FCIRG_10580	related to RNA-directed RNA polymerase	6,67/6,59	-1.00572	0.985647	1
	FgRdRp5	FCIRG_01527	related to NAM7-nonsense-mediated mRNA decay	13,19/13,37	1.02247	0.921056	1
	FgQDE3	FCIRG_09652	bloom syndrome	3,74/3,45	-1.07739	0.862831	1
	MRPL3	FCIRG_01616	related to ribosomal 3	15,12/15,11	1.01071	0.959583	1
	FgQIP	FCIRG_12907	uncharacterized protein FMAN_04817	5,35/5,8	1.09442	0.794777	1
	aGene Ontology (GO) terms assigned by BLAST2GO
	bMean expression levels of F. circinatum Fc072 and Fc072v in RPKM (Reads Per Kilobase of transcript per Million mapped reads)
